# Supplementary material for: Theoretical and experimental insights into the effects of halogen composition on the thermal decomposition details, as well as the fire-suppressing mechanism and performance of CF3CXCH2 (X = F, Cl, Br)
Source: Royal Society of Chemistry journal article supplement (doi:10.1039/d0cp05956k), 2021-01-01
Supplement: d0cp05956k1.pdf [file d0cp05956k1.pdf]

## Electronic Supplementary Information

### **Theoretical and Experimental Insights into the Effects of Halogen Composition on the Thermal-Decomposition Details, as well as the Fire-Suppressing Mechanism and Performance of $\text{CF}_3\text{CX}=\text{CH}_2$ ( $X = \text{F}, \text{Cl}, \text{Br}$ )**

Suting Zhou, Qi Yang, Haijun Zhang,\* Xiaomeng Zhou\*

Center for Aircraft Fire and Emergency, Department of Safety Engineering, Civil Aviation University of China, Tianjin 300300, P. R. China.

To whom correspondence should be addressed. Email: [hjzhang\\_ahu@163.com](mailto:hjzhang_ahu@163.com) (HZ)  
[zhouxm@nankai.edu.cn](mailto:zhouxm@nankai.edu.cn) (XZ)

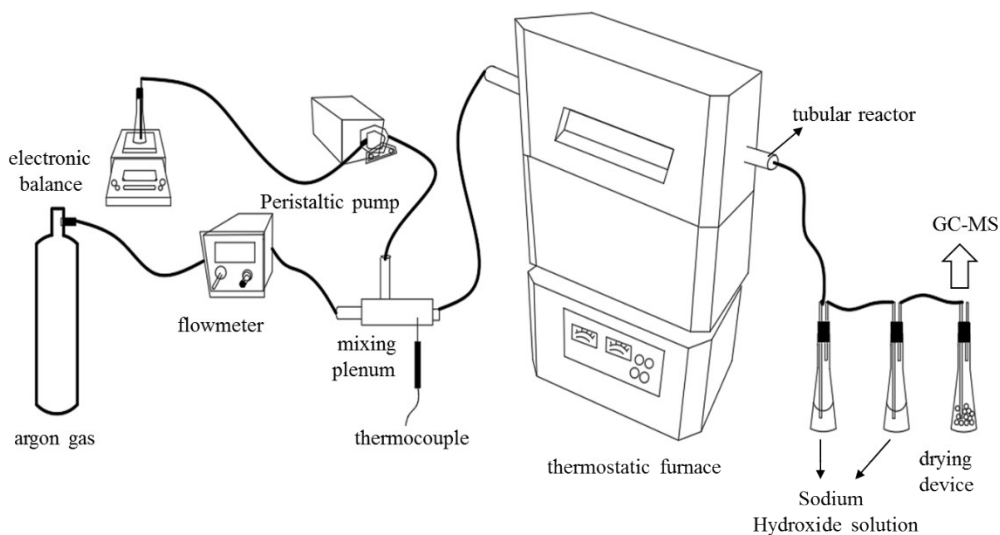

**Figure S1.** The diagram of experimental equipment for thermal decomposition.

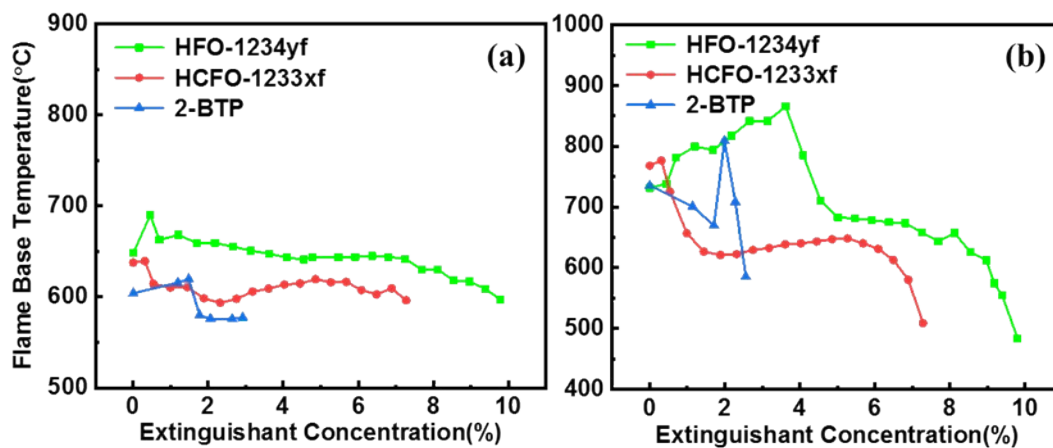

**Figure S2.** The temperature of flame root for (a) propane and (b) methane flame at different concentration of extinguishant.

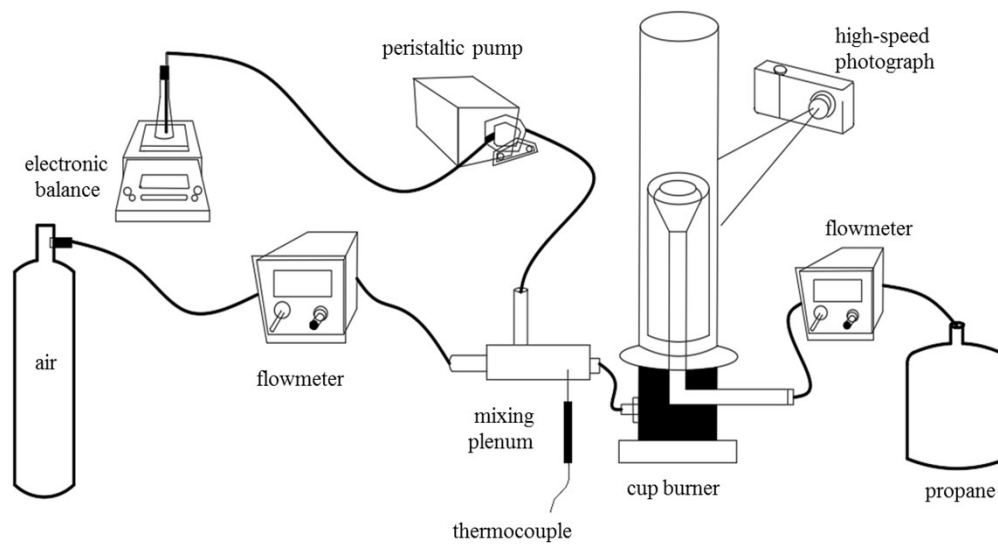

**Figure S3.** The diagram of experimental device for cup-burner measurement.

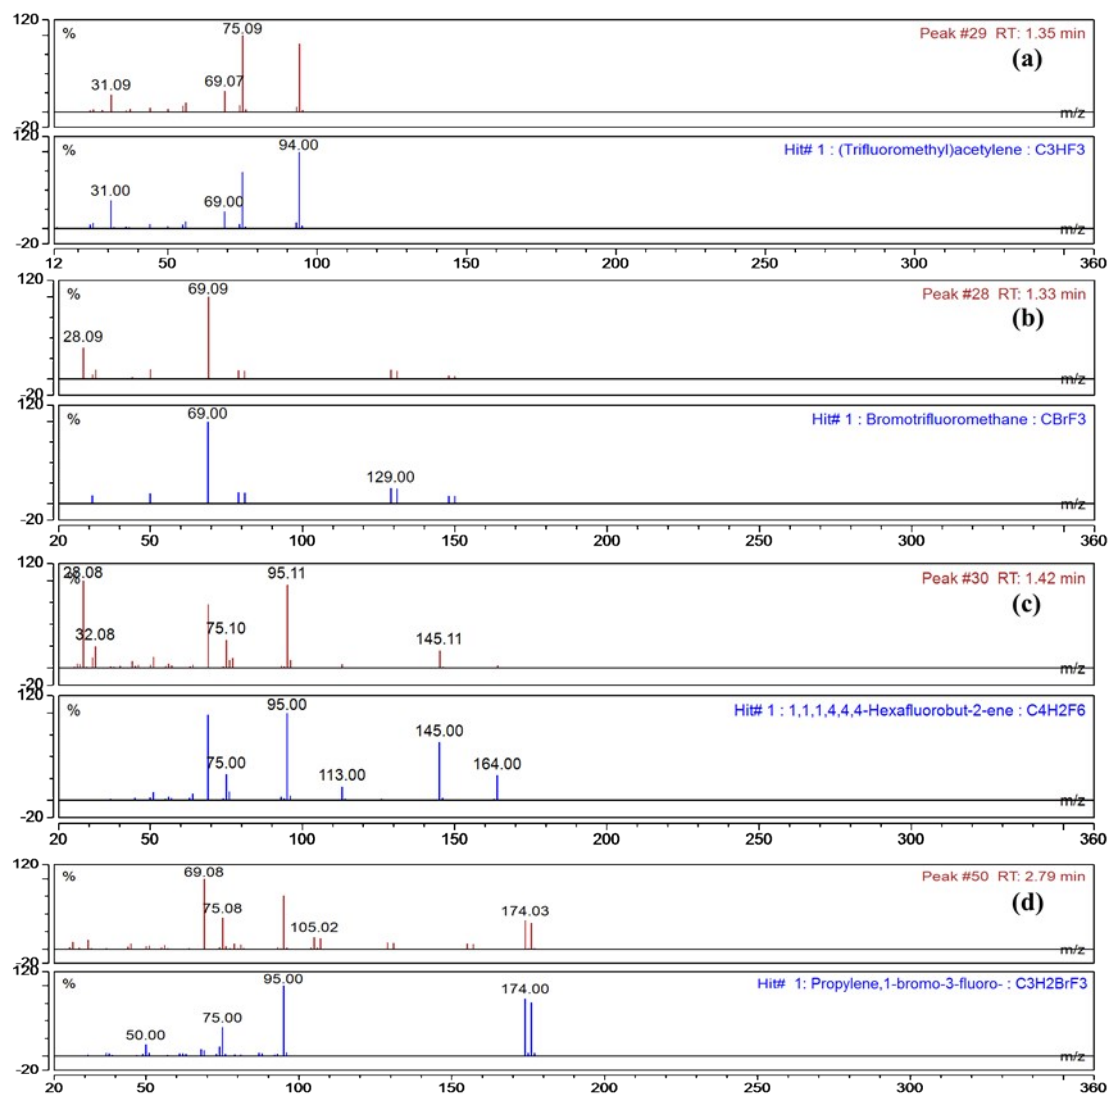

**Figure S4.** The mass spectra of (a)  $\text{CF}_3\text{C}\equiv\text{CH}$ , (b)  $\text{CF}_3\text{Br}$ , (c)  $\text{C}_4\text{H}_2\text{F}_6$  and (d)  $\text{C}_3\text{H}_2\text{F}_3\text{Br}$ .

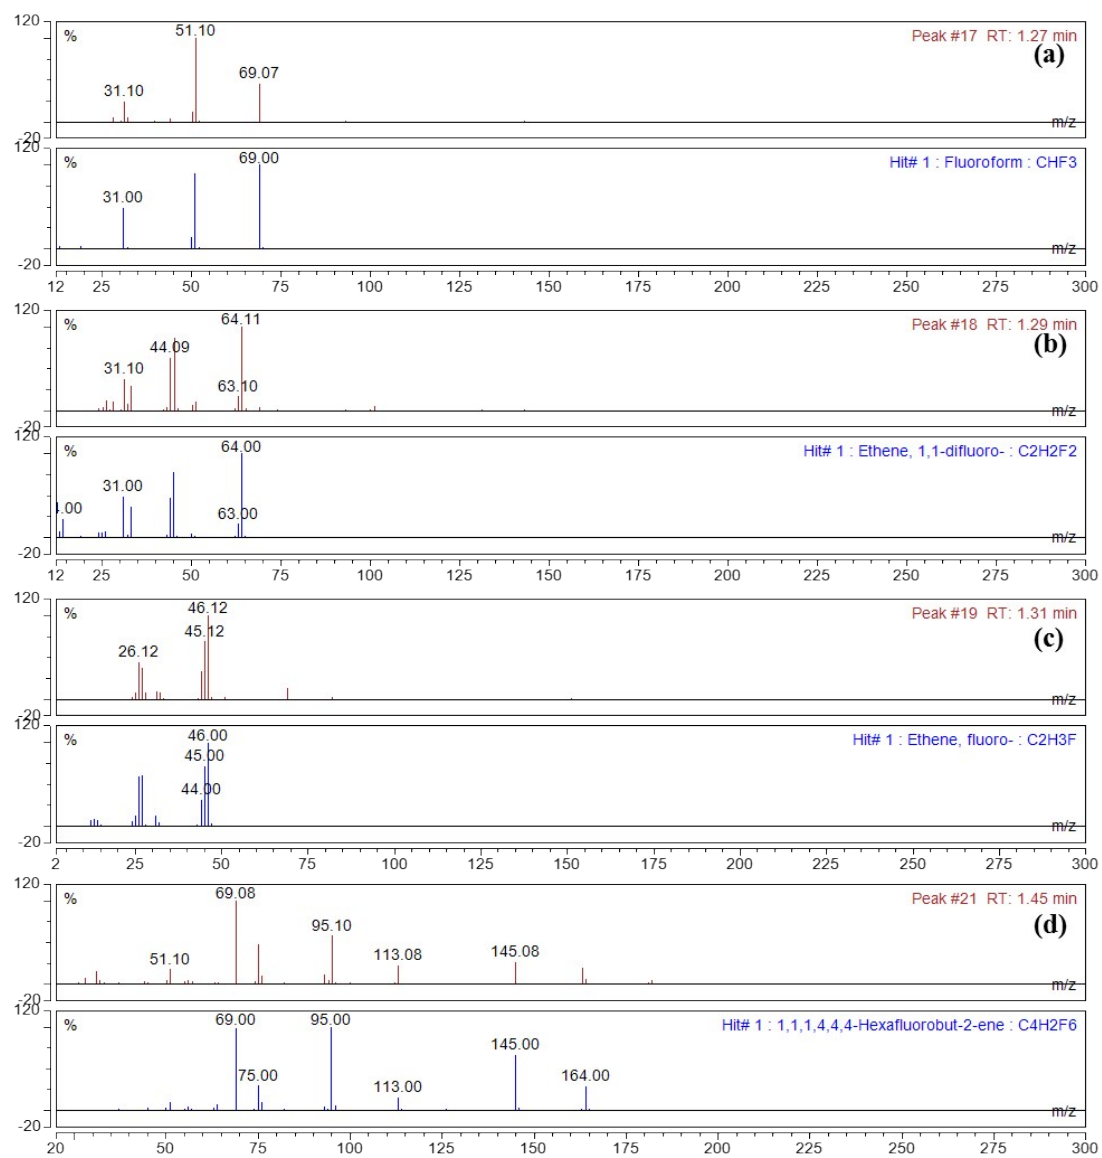

**Figure S5.** The mass spectra of (a) CF<sub>3</sub>H, (b) C<sub>2</sub>H<sub>2</sub>F<sub>2</sub>, (c) C<sub>2</sub>H<sub>3</sub>F and (d) C<sub>4</sub>H<sub>2</sub>F<sub>6</sub>.

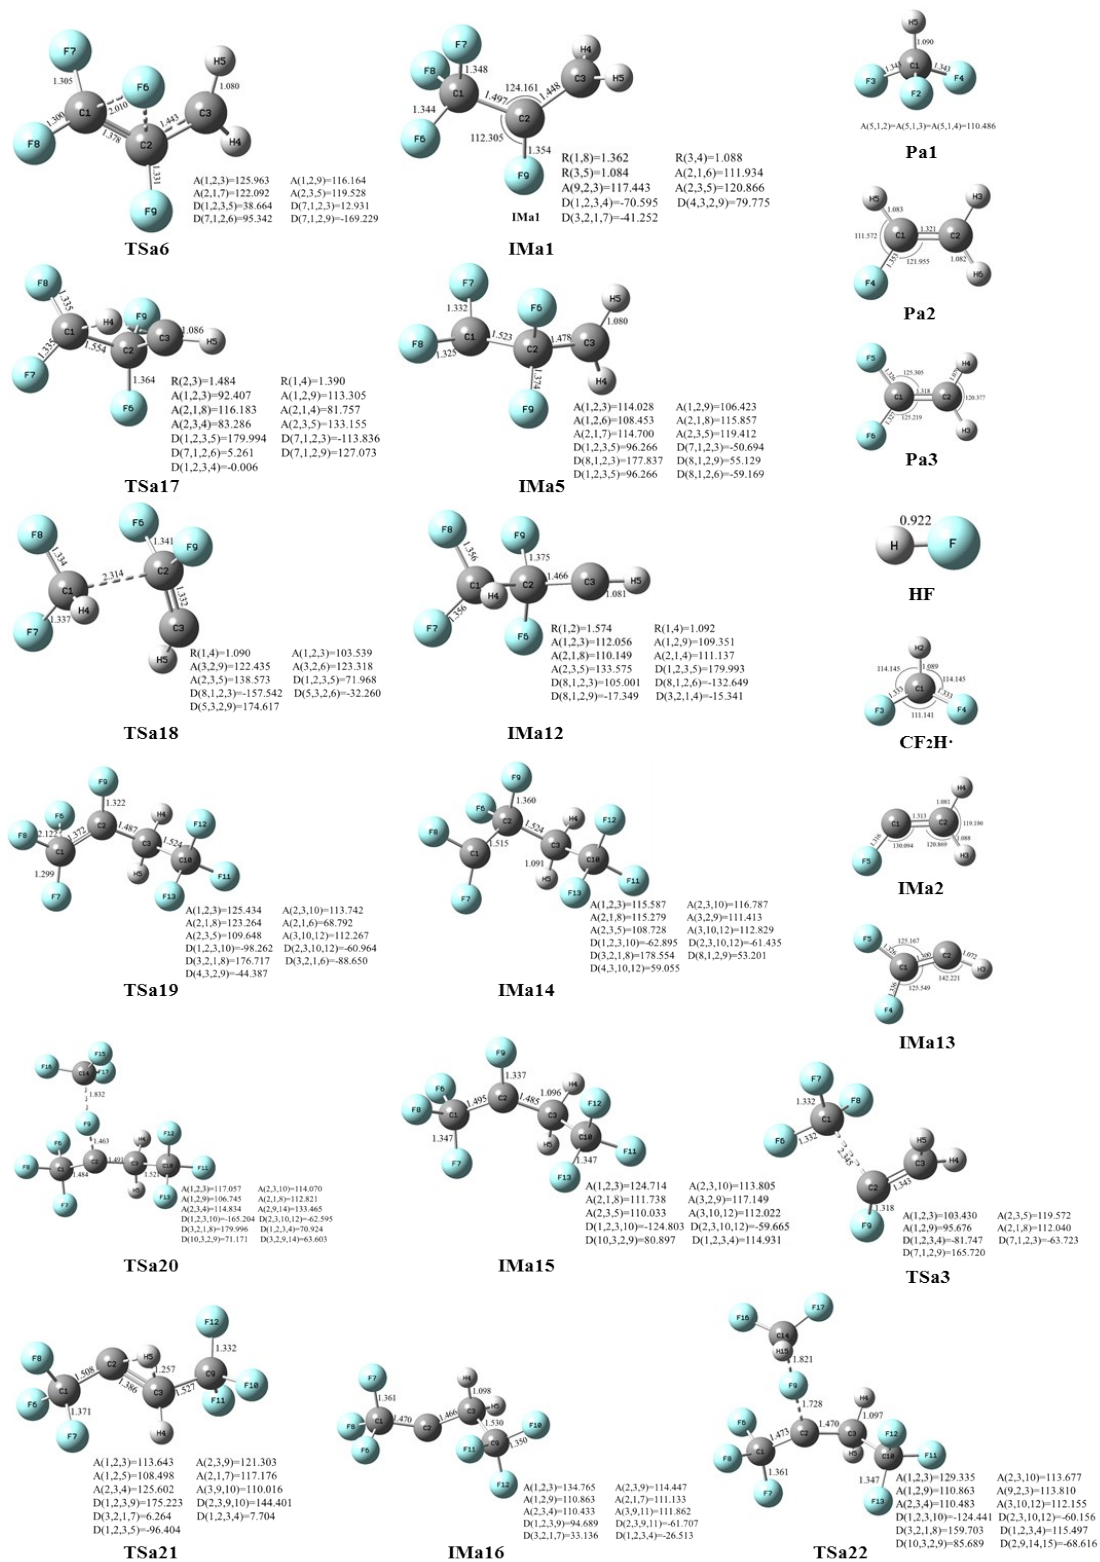

**Figure S6.** Geometric structures of main products, transition states and intermediate products in the optimal decomposition path of HFO-1234yf.

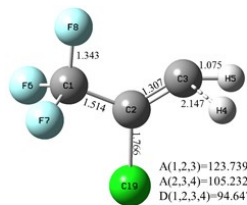

A(1,2,3)=123.739 A(1,2,9)=114.221  
A(2,3,4)=105.232 A(2,3,5)=142.418  
D(1,2,3,4)=94.647 D(8,1,2,3)=4.225  
D(8,1,2,9)=-179.052

**TSb3**

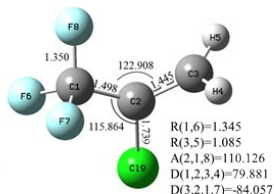

R(1,6)=1.345 R(1,7)=1.361  
R(3,5)=1.085 R(3,4)=1.087  
A(2,1,8)=110.126 A(2,3,5)=120.727  
D(1,2,3,4)=79.881 D(4,3,2,9)=-82.577  
D(3,2,1,7)=-84.057

**IMb1**

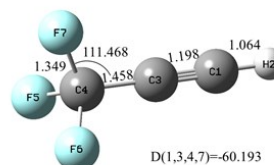

D(1,3,4,7)=-60.193

**Pb1/Pc1**

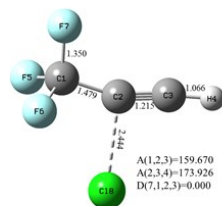

A(1,2,3)=159.670 A(1,2,8)=105.224  
A(2,3,4)=173.926 D(1,2,3,4)=180.000  
D(7,1,2,3)=0.000 D(7,1,2,8)=-180.000

**TSb7**

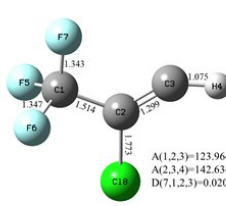

A(1,2,3)=123.964 A(1,2,8)=113.999  
A(2,3,4)=142.634 D(1,2,3,4)=179.985  
D(7,1,2,3)=0.020 D(7,1,2,8)=-179.989

**IMb3**

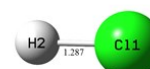

**HCl**

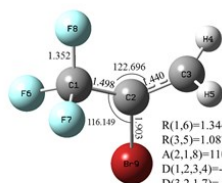

R(1,6)=1.344 R(1,7)=1.361  
R(3,5)=1.087 R(3,4)=1.085  
A(2,1,8)=110.034 A(2,3,5)=120.992  
D(1,2,3,4)=-107.276 D(4,3,2,9)=-92.472  
D(3,2,1,7)=-79.351

**IMc1**

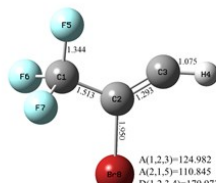

A(1,2,3)=124.982 A(1,2,8)=114.187  
A(2,1,5)=110.845 A(2,3,4)=144.148  
D(1,2,3,4)=179.972 D(1,2,3,5)=-0.003  
D(5,1,2,8)=-179.947

**IMc2**

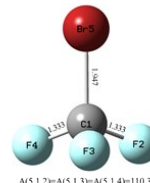

A(5,1,2)=A(5,1,3)=A(5,1,4)=110.344

**Pc2**

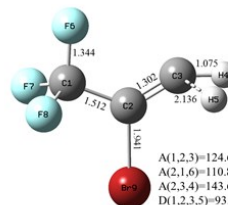

A(1,2,3)=124.643 A(1,2,9)=114.442  
A(2,1,6)=110.812 A(2,3,5)=105.890  
A(2,3,4)=143.668 D(1,2,3,4)=-167.426  
D(1,2,3,5)=93.785 D(6,1,2,3)=4.401  
D(6,1,2,9)=-179.032

**TSb3**

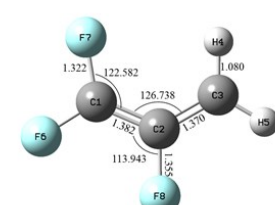

**IMc3**

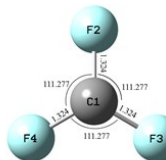

**CF3**

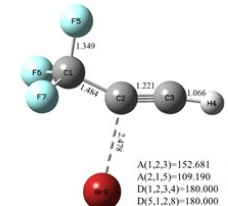

A(1,2,3)=152.681 A(1,2,8)=106.399  
A(2,1,5)=109.190 A(2,3,4)=171.589  
D(1,2,3,4)=180.000 D(3,2,1,5)=0.000  
D(5,1,2,8)=180.000

**TSb8**

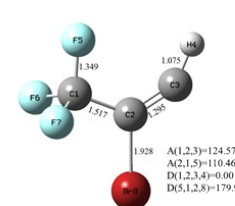

A(1,2,3)=124.576 A(1,2,8)=114.503  
A(2,1,5)=110.461 A(2,3,4)=144.030  
D(1,2,3,4)=0.001 D(3,2,1,5)=-0.003  
D(5,1,2,8)=179.998

**IMc5**

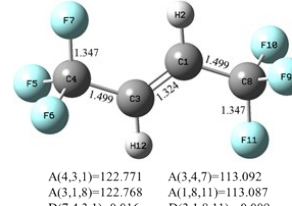

A(4,3,1)=122.771 A(3,4,7)=113.092  
A(3,1,8)=122.768 A(1,8,11)=113.087  
D(7,4,3,1)=0.016 D(3,1,8,11)=-0.009

**Pc3-1**

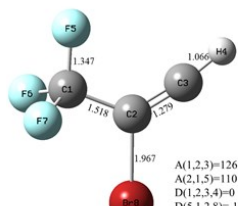

A(1,2,3)=126.102 A(1,2,8)=113.002  
A(2,1,5)=110.477 A(2,3,4)=172.081  
D(1,2,3,4)=0 D(3,2,1,5)=0  
D(5,1,2,8)=-180.000

**TSb9**

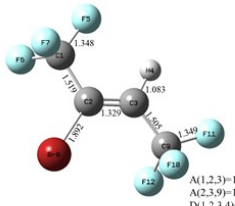

A(1,2,3)=120.924 A(1,2,8)=113.817  
A(2,3,9)=126.345 A(2,3,4)=119.103  
D(1,2,3,4)=-0.013 D(3,2,1,5)=-0.059  
D(1,2,3,9)=-179.970 D(2,3,9,10)=-60.814

**IMc6**

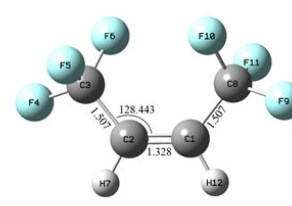

D(6,3,2,1)=35.589

**Pc3-2**

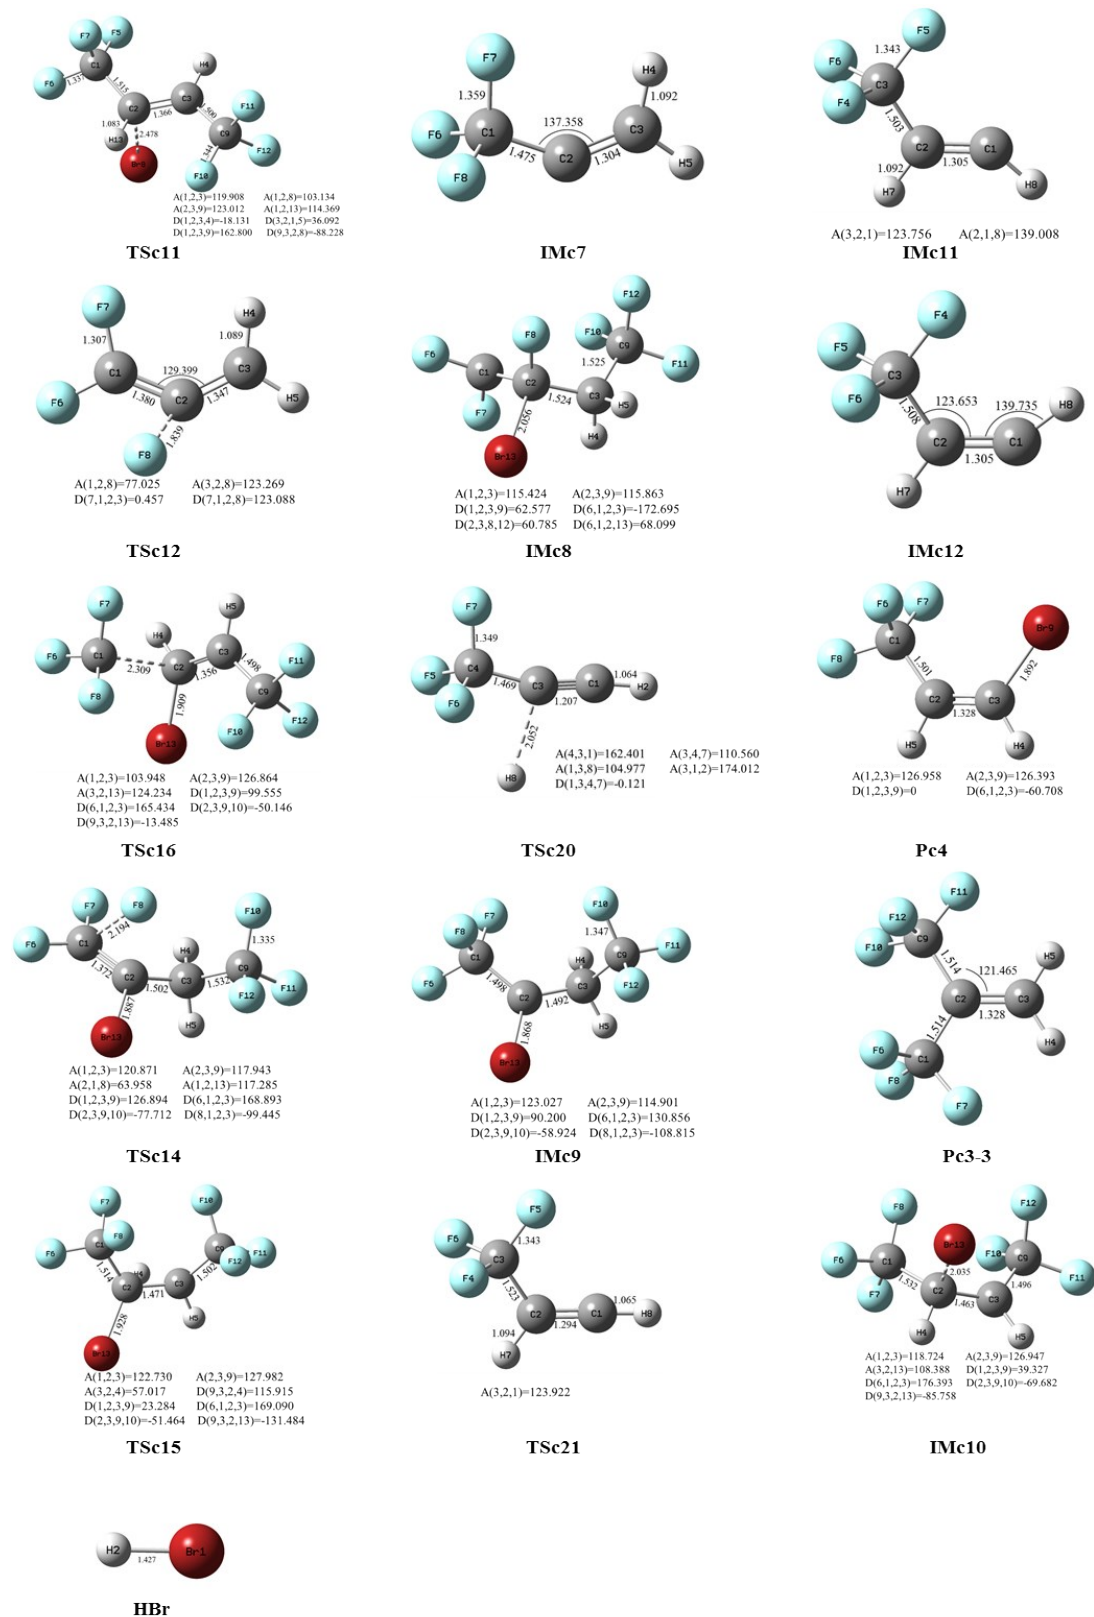

**Figure S7.** Geometric structures of main products, transition states and intermediate products in the optimal decomposition path of HCFO-1233xf and 2-BTP.



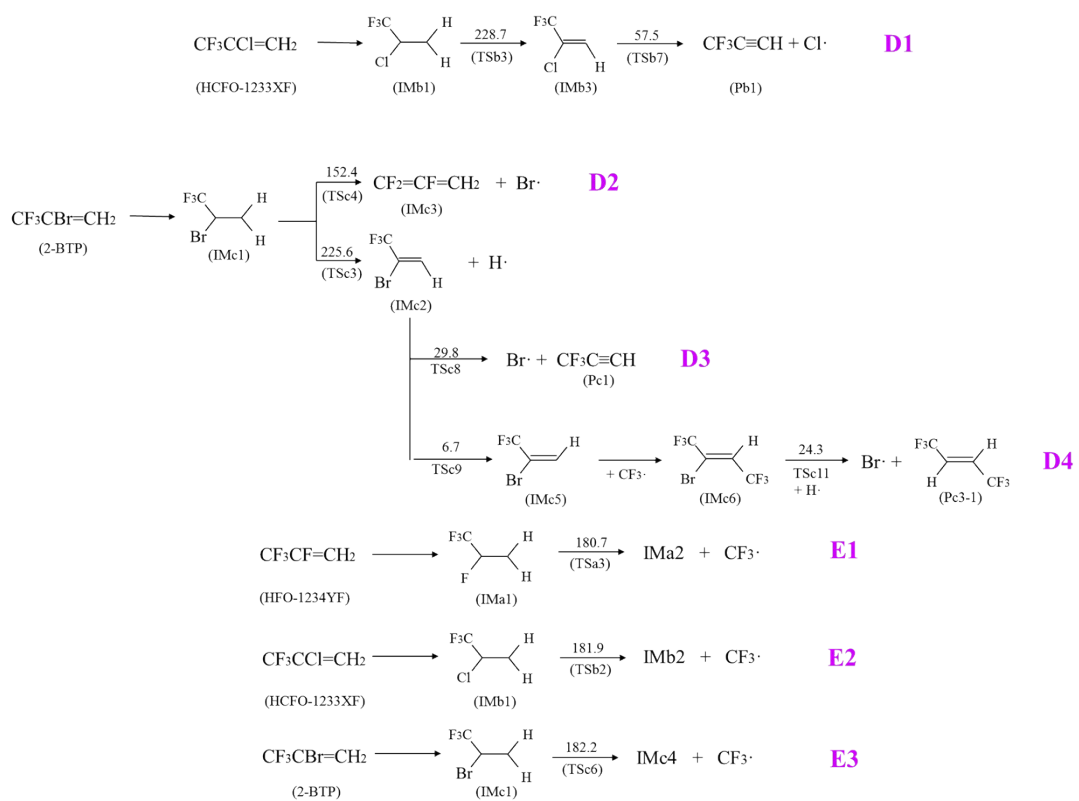

**Figure S8.** The schematic of generation of  $\text{Cl}\cdot$ ,  $\text{Br}\cdot$  and  $\text{CF}_3\cdot$ .

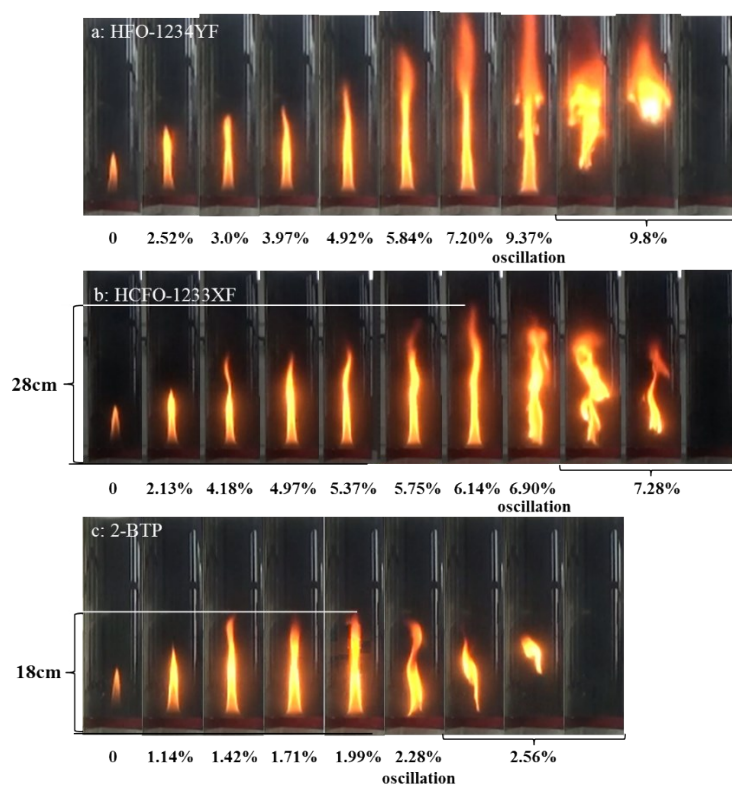

**Figure S9.** Methane-air flame appearance at different concentrations of (a) HFO-1234YF (b) HCFO-1233XF (c) 2-BTP.

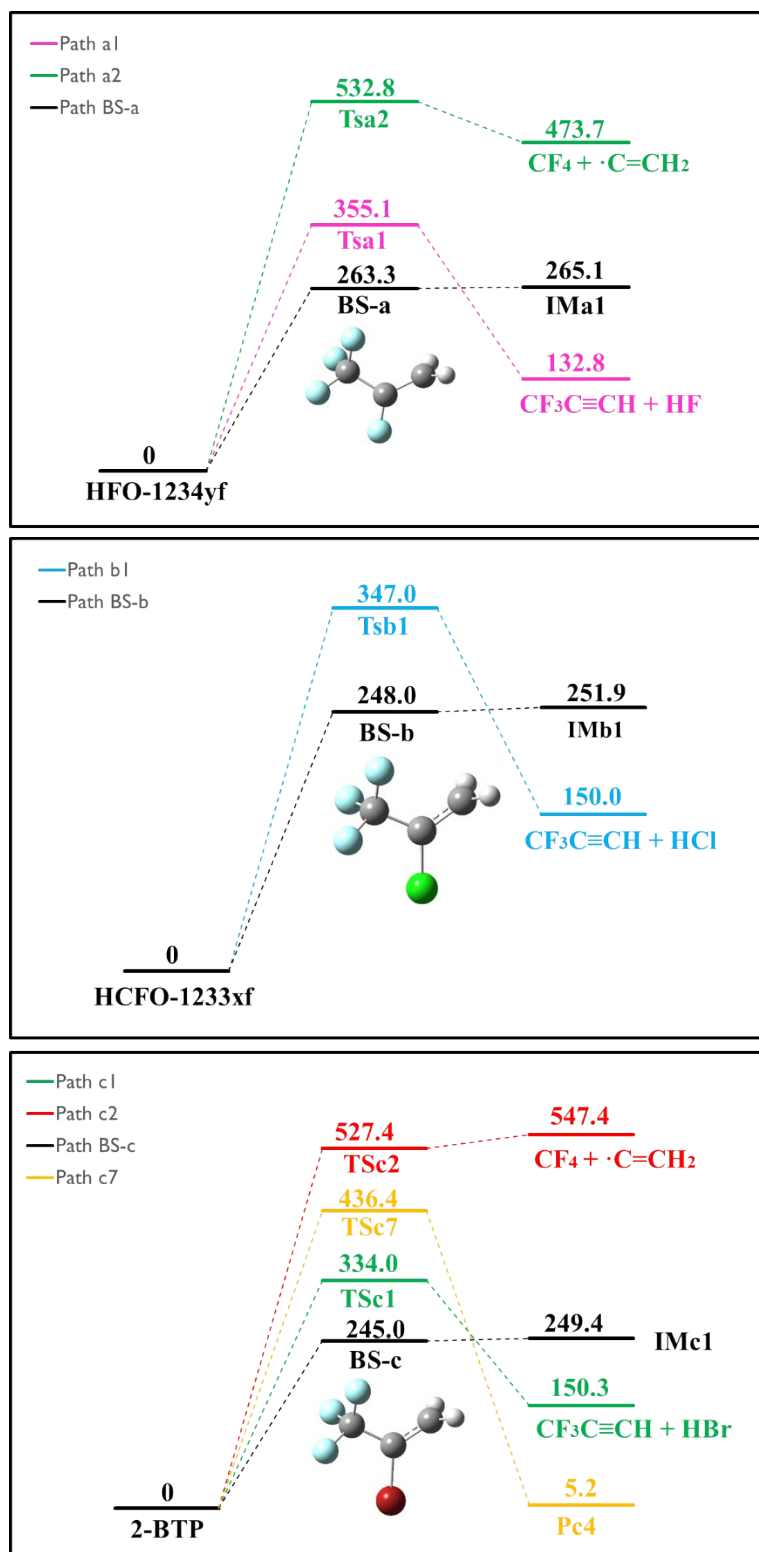

**Figure S10.** The potential energy diagram for the reaction pathways of first-step pyrolysis of HFO-1234yf, HCFO-1233xf and 2-BTP, calculated by using the M06-2X functional.

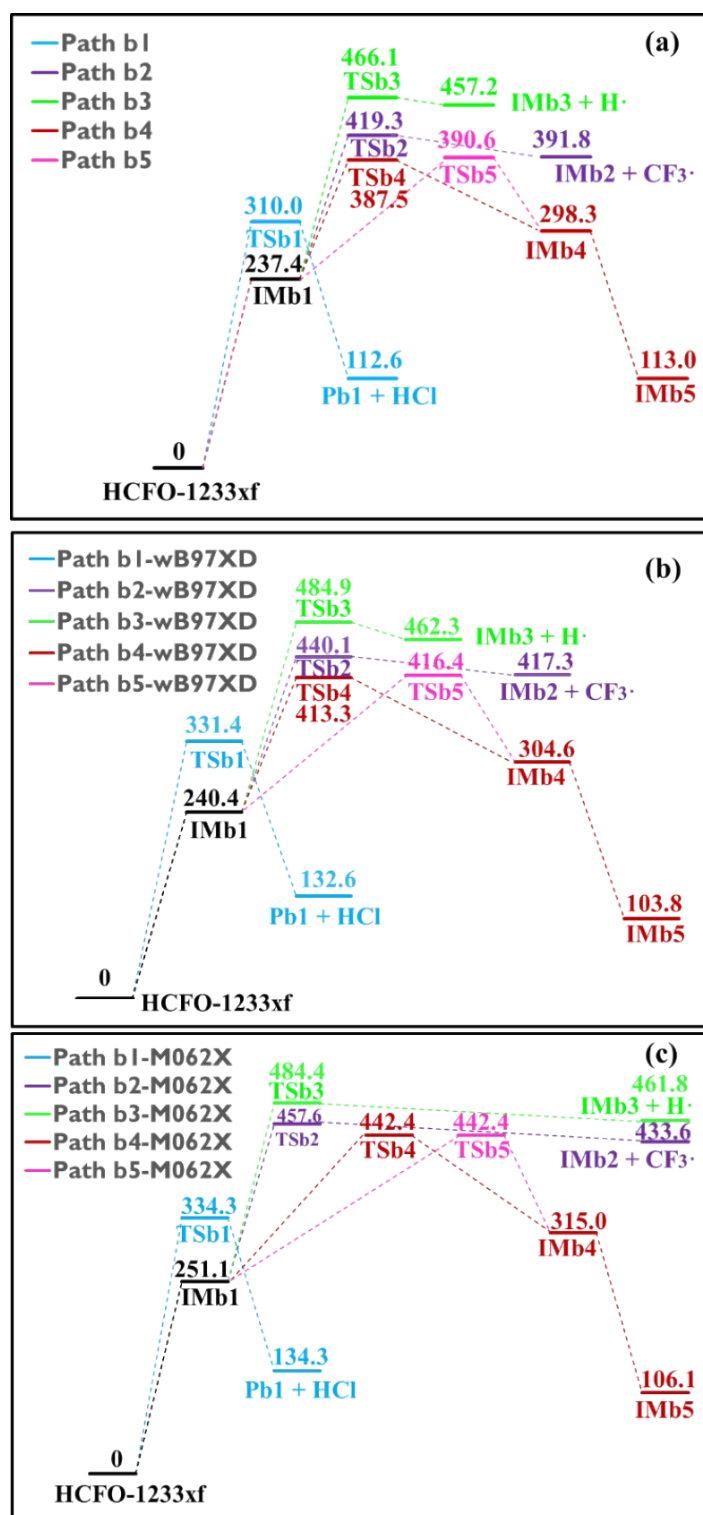

**Figure S11.** The potential energy diagram for the decomposition of HCFO-1233xf, calculated by using the (a) B3LYP, (b) wB97XD and (c) M06-2X functionals.

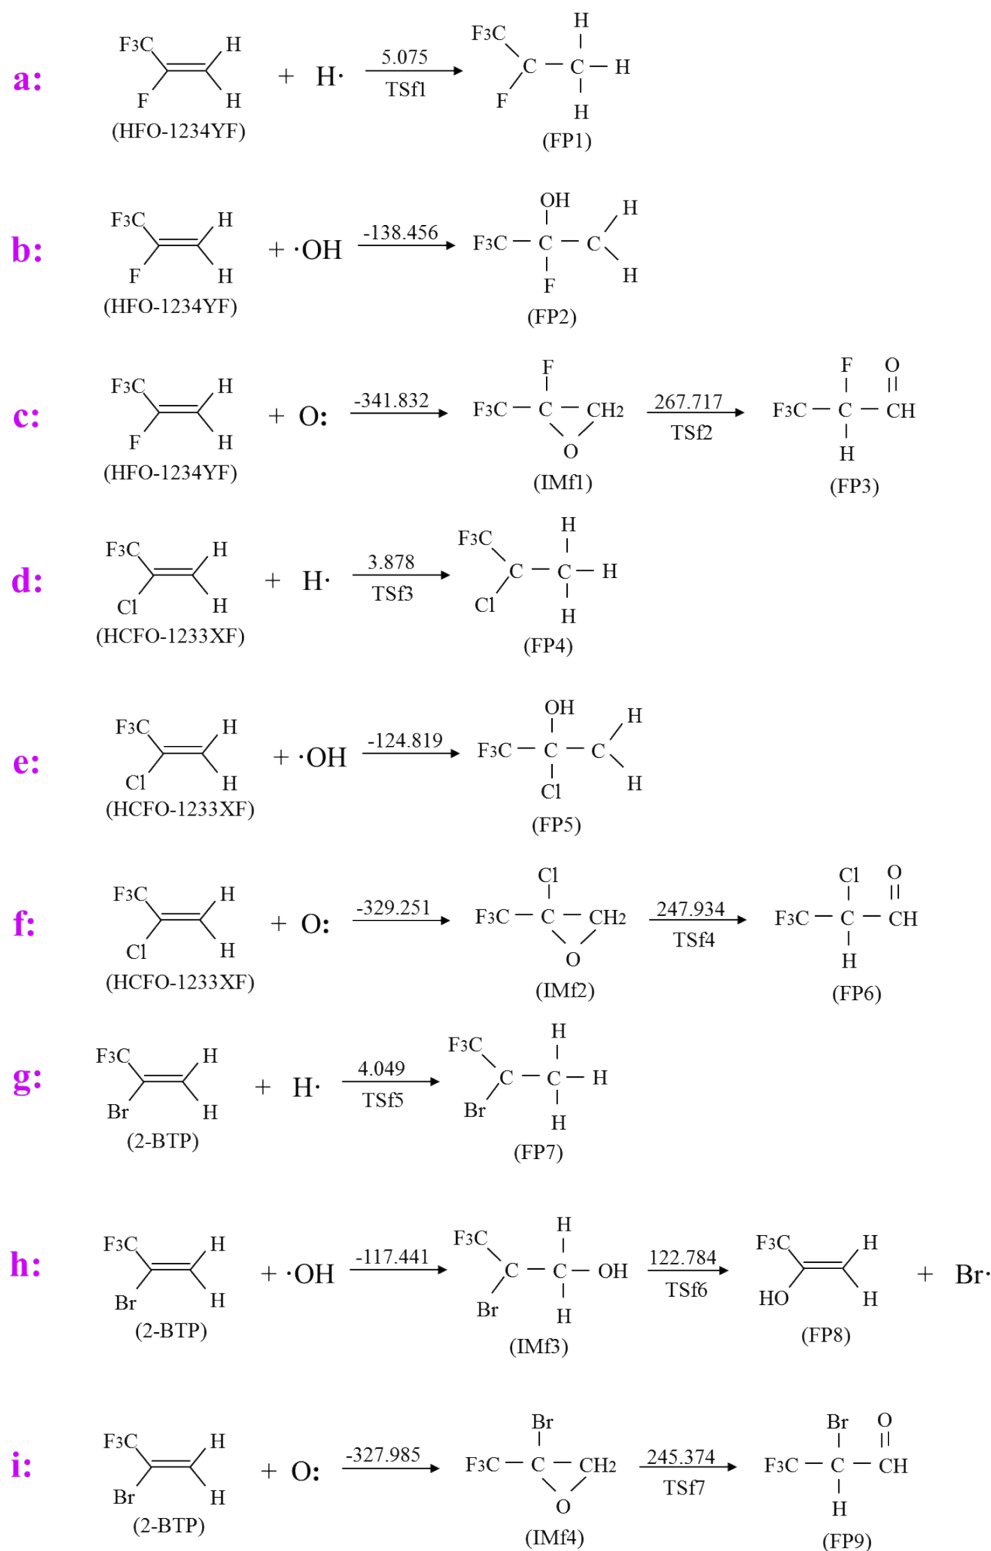

**Figure S12.** Pathways of reactions between the H•, OH• and O• free radicals and investigated HFO-1234YF, HCFO-1233XF and 2-BTP agents. The energy barrier is in the unit of kJ/mol.

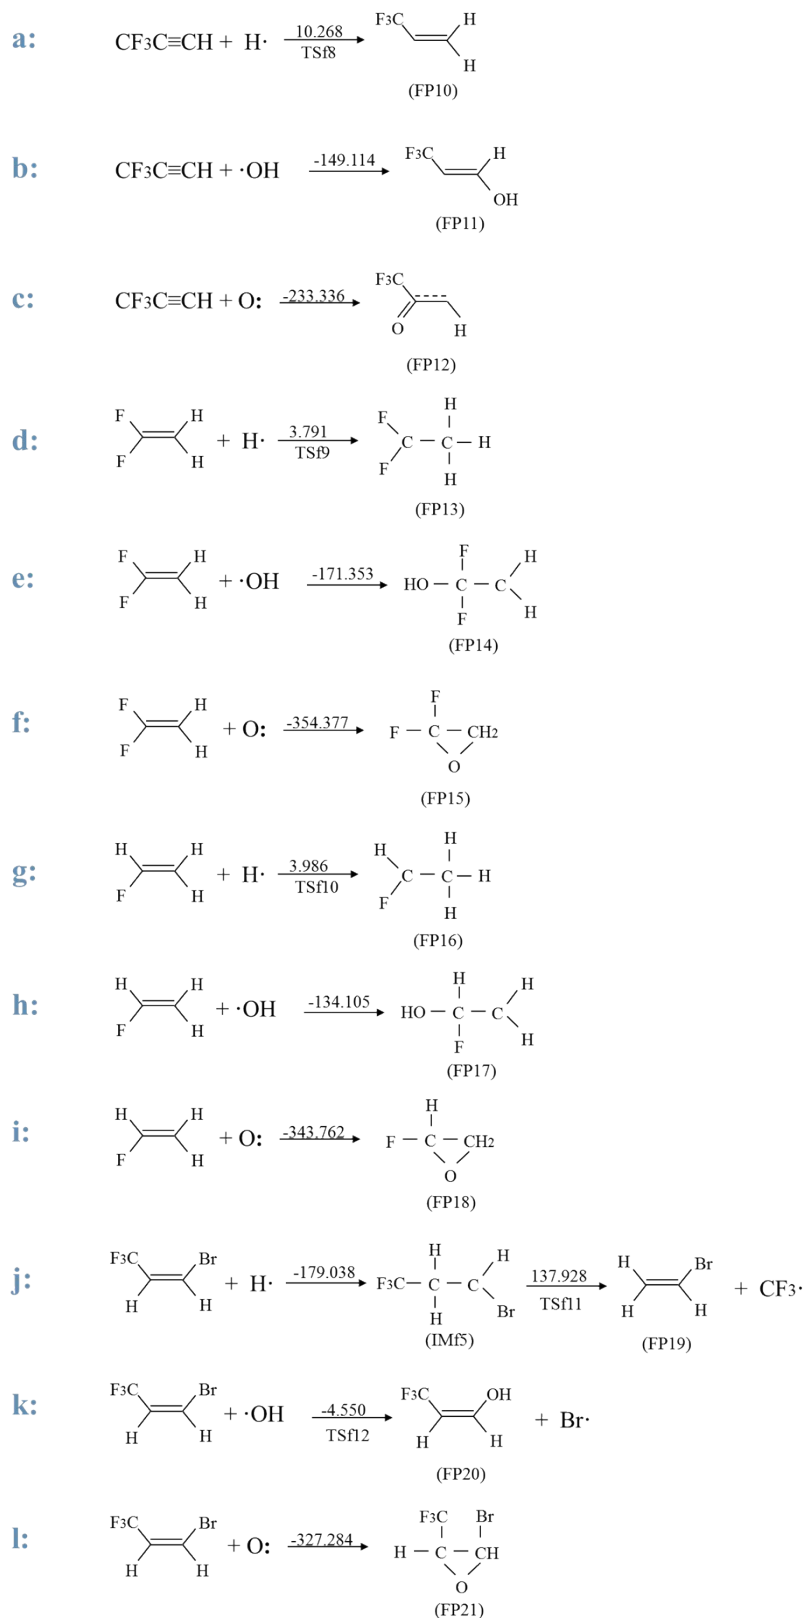

**Figure S13.** Reaction pathways of thermal decomposition products of HCFO-1233XF and HFO-1234YF in the flame with free radicals.

**Table S1.** Setting parameters for GC-MS

| <b>Parameters</b>               | <b>GC-MS</b>                      |
|---------------------------------|-----------------------------------|
| <b>Model number</b>             | Thermal Fisher Trace 1310         |
| <b>Chromatographic column</b>   | DBVRX, 30.0m, 0.25mm, 1.4 $\mu$ m |
| <b>Flow rate of carrier gas</b> | 1.249 ml/min                      |
| <b>Injection mode</b>           | 15 $\mu$ L, gas, splitting mode   |
| <b>Split ratio</b>              | 1:80                              |
| <b>Injector temperature</b>     | 280°C                             |
| <b>Ion source temperature</b>   | 240°C                             |
| <b>Ionization methods</b>       | Electron bombardment              |
| <b>Ionizing energy</b>          | 70eV                              |
| <b>Scanned area</b>             | m/z 20-300                        |

**Table S2.** BDEs of different bonds in HFO-1234yf molecule calculated at UB3LYP/6-311++G (d, p) level. The C-F bond at the middle carbon was highlighted by bold font. The S(S+1) value of  $\bullet\text{CFCF}_3$  and  $\bullet\text{CH}_2$  radicals equals to 2, and the S(S+1) value for other radicals is 0.75. The deviation between S(S+1) and  $\langle S^2 \rangle$  locates at an acceptable range ( $\Delta < 10\%$ ).

| Bonds      | Molecular<br>Fragment                      | Ee + ZPE<br>(Hartree) | $\langle S^2 \rangle$ | BDEs <sup>a</sup><br>(kJ mol <sup>-1</sup> ) | Bond distance<br>(Å) |
|------------|--------------------------------------------|-----------------------|-----------------------|----------------------------------------------|----------------------|
| C-C        | $\bullet\text{CF}_3$                       | -337.658811           | 0.7517                | 408.722                                      | 1.509                |
|            | $\bullet\text{CF}=\text{CH}_2$             | -177.165581           | 0.7599                |                                              |                      |
| C=C        | $\bullet\text{CFCF}_3$                     | -475.559668           | 2.0041                | 712.595                                      | 1.320                |
|            | $\bullet\text{CH}_2$                       | -39.148985            | 2.0053                |                                              |                      |
| C-F        | $\bullet\text{F}$                          | -99.76058             | 0.7513                | 443.142                                      | 1.349                |
|            | $\bullet\text{CF}_2=\text{CF}=\text{CH}_2$ | -415.050702           | 0.7759                |                                              |                      |
|            | $\bullet\text{F}$                          | -99.76058             | 0.7513                | 443.142                                      | 1.347                |
|            | $\bullet\text{CF}_2=\text{CF}=\text{CH}_2$ | -415.050702           | 0.7759                |                                              |                      |
|            | $\bullet\text{F}$                          | -99.76058             | 0.7513                | 443.137                                      | 1.345                |
|            | $\bullet\text{CF}_2=\text{CF}=\text{CH}_2$ | -415.050704           | 0.7759                |                                              |                      |
| <b>C-F</b> | $\bullet\text{F}$                          | -99.76058             | 0.7513                | <b>483.000</b>                               | <b>1.346</b>         |
|            | $\bullet\text{CF}_3\text{C}=\text{CH}_2$   | -415.035521           | 0.7601                |                                              |                      |
| C-H        | $\bullet\text{H}$                          | -0.502257             | 0.75                  | 470.238                                      | 1.080                |
|            | $\bullet\text{CH}=\text{CFCF}_3$           | -514.298705           | 0.7597                |                                              |                      |
|            | $\bullet\text{H}$                          | -0.502257             | 0.75                  | 469.269                                      | 1.082                |
|            | $\bullet\text{CH}=\text{CFCF}_3$           | -514.299074           | 0.7601                |                                              |                      |
| HFO-1234yf |                                            | -514.980066           | ---                   | ---                                          | ---                  |



**Table S3.** BDEs of different bonds in HCFO-1233xf molecule calculated at UB3LYP/6-311++G (d, p) level. The C-Cl bond at the middle carbon was highlighted by bold font. The S(S+1) value of  $\bullet\text{CClCF}_3$  and  $\bullet\text{CH}_2$  radicals equals to 2, and the S(S+1) value for other radicals is 0.75. The deviation between S(S+1) and  $\langle S^2 \rangle$  locates at an acceptable range ( $\Delta < 10\%$ ).

| Bonds       | Molecular<br>Fragment                       | Ee + ZPE<br>(Hartree) | $\langle S^2 \rangle$ | BDEs <sup>a</sup><br>(kJ mol <sup>-1</sup> ) | Bond distance<br>(Å) |
|-------------|---------------------------------------------|-----------------------|-----------------------|----------------------------------------------|----------------------|
| C-C         | $\bullet\text{CF}_3$                        | -337.658811           | 0.7517                | 391.769                                      | 1.512                |
|             | $\bullet\text{CCl}=\text{CH}_2$             | -537.528151           | 0.7599                |                                              |                      |
| C=C         | $\bullet\text{CClCF}_3$                     | -835.928239           | 2.0063                | 679.886                                      | 1.325                |
|             | $\bullet\text{CH}_2$                        | -39.148985            | 2.0053                |                                              |                      |
| C-F         | $\bullet\text{F}$                           | -99.76058             | 0.7513                | 440.496                                      | 1.348                |
|             | $\bullet\text{CF}_2=\text{CCl}=\text{CH}_2$ | -775.407823           | 0.7774                |                                              |                      |
|             | $\bullet\text{F}$                           | -99.76058             | 0.7513                | 440.496                                      | 1.348                |
|             | $\bullet\text{CF}_2=\text{CCl}=\text{CH}_2$ | -775.407823           | 0.7774                |                                              |                      |
| C-F         | $\bullet\text{F}$                           | -99.76058             | 0.7513                | 476.780                                      | 1.348                |
|             | $\bullet\text{CF}_2=\text{CCl}=\text{CH}_2$ | -775.394003           | 0.7527                |                                              |                      |
| C-Cl        | $\bullet\text{Cl}$                          | -460.166882           | 0.7518                | <b>351.229</b>                               | <b>1.745</b>         |
|             | $\bullet\text{CF}_3\text{C}=\text{CH}_2$    | -415.035521           | 0.7601                |                                              |                      |
| C-H         | $\bullet\text{H}$                           | -0.502257             | 0.75                  | 457.165                                      | 1.082                |
|             | $\bullet\text{CH}=\text{CClCF}_3$           | -874.659797           | 0.7611                |                                              |                      |
|             | $\bullet\text{H}$                           | -0.502257             | 0.75                  | 460.988                                      | 1.082                |
|             | $\bullet\text{CH}=\text{CClCF}_3$           | -874.658341           | 0.7611                |                                              |                      |
| HCFO-1233xf |                                             | -875.336179           | ---                   | ---                                          | ---                  |

**Table S4.** BDEs of different bonds in 2-BTP molecule calculated at UB3LYP/6-311++G (d, p) level. The C-Br bond at the middle carbon was highlighted by bold font. The S(S+1) value of  $\cdot\text{CBrCF}_3$  and  $\cdot\text{CH}_2$  radicals equals to 2, and the S(S+1) value for other radicals is 0.75. The deviation between S(S+1) and  $\langle S^2 \rangle$  locates at an acceptable range ( $\Delta < 10\%$ ).

| Bonds | Molecular<br>Fragment                     | Ee + ZPE<br>(Hartree) | $\langle S^2 \rangle$ | BDEs <sup>a</sup><br>(kJ mol <sup>-1</sup> ) | Bond distance<br>(Å) |
|-------|-------------------------------------------|-----------------------|-----------------------|----------------------------------------------|----------------------|
| C-C   | $\cdot\text{CF}_3$                        | -337.658811           | 0.7517                | 387.309                                      | 1.511                |
|       | $\cdot\text{CBr}=\text{CH}_2$             | -2651.450612          | 0.76                  |                                              |                      |
| C=C   | $\cdot\text{CBrCF}_3$                     | -2949.851418          | 2.0074                | 673.535                                      | 1.325                |
|       | $\cdot\text{CH}_2$                        | -39.148985            | 2.0053                |                                              |                      |
| C-F   | $\cdot\text{F}$                           | -99.76058             | 0.7513                | 438.960                                      | 1.348                |
|       | $\cdot\text{CF}_2=\text{CBr}=\text{CH}_2$ | -2889.329168          | 0.7772                |                                              |                      |
|       | $\cdot\text{F}$                           | -99.76058             | 0.7513                | 438.960                                      | 1.347                |
|       | $\cdot\text{CF}_2=\text{CBr}=\text{CH}_2$ | -2889.329168          | 0.7772                |                                              |                      |
|       | $\cdot\text{F}$                           | -99.76058             | 0.7513                | 472.679                                      | 1.350                |
|       | $\cdot\text{CF}_2=\text{CBr}=\text{CH}_2$ | -2889.316325          | -0.7532               |                                              |                      |
| C-Br  | $\cdot\text{Br}$                          | -2574.105777          | 0.7515                | <b>303.615</b>                               | <b>1.906</b>         |
|       | $\cdot\text{CF}_3\text{C}=\text{CH}_2$    | -415.035521           | 0.7601                |                                              |                      |
| C-H   | $\cdot\text{H}$                           | -0.502257             | 0.75                  | 455.514                                      | 1.081                |
|       | $\cdot\text{CH}=\text{CBrCF}_3$           | -2988.581186          | 0.7612                |                                              |                      |
|       | $\cdot\text{H}$                           | -0.502257             | 0.75                  | 449.207                                      | 1.083                |
|       | $\cdot\text{CH}=\text{CBrCF}_3$           | -2988.583588          | 0.7619                |                                              |                      |
| 2-BTP |                                           | -2989.256939          | ---                   | ---                                          | ---                  |

### Computational Details for the BDEs

The bond dissociation energies (BDEs) of molecules, which is energy consumed or released by breaking or forming a bond in a molecule, were calculated by using UB3LYP method. For instance, The BDE(C-C) is defined according the homolytic reaction ( $\text{CF}_3\text{CCl}=\text{CH}_2 \rightarrow \bullet\text{CF}_3 + \bullet\text{CCl}=\text{CH}_2$ ) with the equation:

$$\text{BDE(C-C)} = [E_e(\bullet\text{CF}_3) + E_{\text{ZPE}}(\bullet\text{CF}_3)] + [E_e(\bullet\text{CCl}=\text{CH}_2) + E_{\text{ZPE}}(\bullet\text{CCl}=\text{CH}_2)] - [E_e(\text{CF}_3\text{CCl}=\text{CH}_2) + E_{\text{ZPE}}(\text{CF}_3\text{CCl}=\text{CH}_2)].$$

where  $E_e$  and  $E_{\text{ZPE}}$  denote the electronic energy and zero-point energy for these fragments/molecules of  $\bullet\text{CF}_3$ ,  $\bullet\text{CCl}=\text{CH}_2$  and  $\text{CF}_3\text{CCl}=\text{CH}_2$ . As recommended by the previous study, the UB3LYP method can give reliable results and the spin contamination  $\langle S^2 \rangle$  locates at an acceptable range ( $< 10\%$ ), as listed in Table S2-S4.

**Table S5.** The Decomposition products and their preferable pathways of HFO-1234yf

| Products                                       | Preferable pathways                                                                                                                                                                                                          |
|------------------------------------------------|------------------------------------------------------------------------------------------------------------------------------------------------------------------------------------------------------------------------------|
| $\text{CF}_3\text{H}$                          | <b>A1'</b> : HFO-1234yf $\rightarrow$ IMa1 $\rightarrow$ TSa6 $\rightarrow$ IMa5 $\rightarrow$ IMa14 $\rightarrow$ TSa9 $\rightarrow$ IMa15 $\rightarrow$ Pa1                                                                |
| $\text{CFH}=\text{CH}_2$                       | <b>A2</b> : HFO-1234yf $\rightarrow$ IMa1 $\rightarrow$ TSa3 $\rightarrow$ IMa2 $\rightarrow$ Pa2                                                                                                                            |
| $\text{CF}_2=\text{CH}_2$                      | <b>A3'</b> : HFO-1234yf $\rightarrow$ IMa1 $\rightarrow$ TSa6 $\rightarrow$ IMa5 $\rightarrow$ TSa17 $\rightarrow$ IMa12 $\rightarrow$ TSa18 $\rightarrow$ IMa13 $\rightarrow$ Pa3                                           |
| $\text{CF}_3\text{CH}=\text{CHCF}_3(\text{E})$ | <b>A4'</b> : HFO-1234yf $\rightarrow$ IMa1 $\rightarrow$ TSa6 $\rightarrow$ IMa5 $\rightarrow$ IMa14 $\rightarrow$ TSa19 $\rightarrow$ IMa15 $\rightarrow$ TSa20 $\rightarrow$ IMa16 $\rightarrow$ TSa21 $\rightarrow$ Pa4-1 |
| $\text{CF}_3\text{CH}=\text{CHCF}_3(\text{Z})$ | <b>A4''</b> : HFO-1234yf $\rightarrow$ IMa1 $\rightarrow$ TSa4 $\rightarrow$ IMa3 $\rightarrow$ IMa6 $\rightarrow$ TSa11 $\rightarrow$ IMa7 $\rightarrow$ Pa4-2                                                              |

**Table S6.** The decomposition products and their preferable pathways of HCFO-1233xf and 2-BTP

| Substances  | Products                                       | Preferable pathways                                                                                                                                                                                                                      |
|-------------|------------------------------------------------|------------------------------------------------------------------------------------------------------------------------------------------------------------------------------------------------------------------------------------------|
| HCFO-1233xf | $\text{CF}_3\text{C}\equiv\text{CH}$           | <b>B1:</b> HCFO-1233xf $\rightarrow$ IMb1 $\rightarrow$ TSb3 $\rightarrow$ IMb3 $\rightarrow$ TSb7 $\rightarrow$ Pb1 + Cl•                                                                                                               |
|             | $\text{CF}_3\text{C}\equiv\text{CH}$           | <b>C1:</b> 2-BTP $\rightarrow$ IMc1 $\rightarrow$ TSc3 $\rightarrow$ IMc2 $\rightarrow$ TSc8 $\rightarrow$ Pc1 + Br•                                                                                                                     |
| 2-BTP       | $\text{CF}_3\text{Br}$                         | $\text{CF}_3\bullet + \text{Br}\bullet \rightarrow \text{CF}_3\text{Br}$                                                                                                                                                                 |
|             | $\text{CF}_3\text{CH}=\text{CHCF}_3(\text{E})$ | <b>C3:</b> 2-BTP $\rightarrow$ IMc1 $\rightarrow$ TSc3 $\rightarrow$ IMc2 $\rightarrow$ TSc9 $\rightarrow$ IMc5 $\rightarrow$ IMc6 $\rightarrow$ TSc11 $\rightarrow$ Pc3-1 + Br•                                                         |
|             |                                                | <b>C3':</b> 2-BTP $\rightarrow$ IMc1 $\rightarrow$ TSc3 $\rightarrow$ IMc2 $\rightarrow$ TSc8 $\rightarrow$ Pc1 $\rightarrow$ TSc20 $\rightarrow$ IMc11 $\rightarrow$ TSc21 $\rightarrow$ IMc12 $\rightarrow$ Pc3-1                      |
|             | $\text{CF}_3\text{CH}=\text{CHCF}_3(\text{Z})$ | <b>C3'':</b> 2-BTP $\rightarrow$ IMc1 $\rightarrow$ TSc3 $\rightarrow$ IMc2 $\rightarrow$ TSc8 $\rightarrow$ Pc1 $\rightarrow$ TSc20 $\rightarrow$ IMc11 $\rightarrow$ Pc3-2                                                             |
|             | $(\text{CF}_3)_2\text{C}=\text{CH}_2$          | <b>C3''':</b> 2-BTP $\rightarrow$ IMc1 $\rightarrow$ TSc4 $\rightarrow$ IMc3 $\rightarrow$ TSc12 $\rightarrow$ IMc7 $\rightarrow$ Pc3-3                                                                                                  |
|             | $\text{CF}_3\text{CH}=\text{CHBr}(\text{Z})$   | <b>C4:</b> 2-BTP $\rightarrow$ IMc1 $\rightarrow$ TSc4 $\rightarrow$ IMc3 $\rightarrow$ IMc8 $\rightarrow$ TSc14 $\rightarrow$ IMc9 $\rightarrow$ TSc15 $\rightarrow$ IMc10 $\rightarrow$ TSc16 $\rightarrow$ Pc4 + $\text{CF}_3\bullet$ |

**Table S7.** Energy barriers for the transition states of first-step pyrolysis reactions of  $\text{CF}_3\text{CX}=\text{CH}_2$  ( $\text{X} = \text{F}, \text{Cl}, \text{Br}$ ) substances. The TS states of BS-a, BS-b and BS-c represent the broken-symmetry states occurred in the generation of triplet states of IMa1, IMb1 and IMc1. All the energy barriers are in the unit of kJ/mol.

| molecules   | TS states   | B3LYP        | PBE0/cc-pVDZ | PBE0/6-311++G(d,p) | M06-2X/6-311G(d) |
|-------------|-------------|--------------|--------------|--------------------|------------------|
| HFO-1234yf  | <b>BS-a</b> | <b>364.7</b> | <b>242.1</b> | <b>239.1</b>       | <b>263.3</b>     |
|             | TSa1        | 311.5        | 323.1        | 320.2              | 355.1            |
|             | TSa2        | 509.5        | 513.3        | 526.1              | 532.8            |
| HCFO-1233xf | <b>BS-b</b> | <b>346.0</b> | <b>224.4</b> | <b>223.6</b>       | <b>248.0</b>     |
|             | TSb1        | 310.0        | 320.3        | 324.0              | 347.0            |
| 2-BTP       | <b>BS-c</b> | <b>336.7</b> | <b>220.5</b> | <b>219.5</b>       | <b>245.0</b>     |
|             | TSc1        | 296.6        | 311.1        | 312.7              | 334.0            |
|             | TSc2        | 498.7        | 514.0        | 516.3              | 527.4            |
|             | TSc7        | 409.1        | 430.0        | 425.8              | 436.4            |
